1 **The *Thermosynechococcus* genus: wide environmental distribution, but a highly**  
2 **conserved genomic core**

3

4 **A. Paulina Prondzinsky<sup>1,2\*</sup>, Sarah J. Berkemer<sup>3,4</sup>, Lewis M. Ward<sup>2,5</sup>, Shawn E. McGlynn<sup>2\*</sup>**

5 <sup>1</sup>Department of Chemical Science and Engineering, Tokyo Institute of Technology, Meguro-ku, Tokyo 152-8550 Japan

6 <sup>2</sup>Earth-Life Science Institute, Ota-ku, Tokyo 145-0061, Japan

7 <sup>3</sup>Bioinformatics Group, Department of Computer Science, University Leipzig, Leipzig, Germany

8 <sup>4</sup>Competence Center for Scalable Data Services and Solutions, Dresden/Leipzig, Germany

9 <sup>5</sup>Department of Earth and Planetary Sciences, Harvard University, Cambridge, MA, USA

10

11 \*prondzinsky@elsi.jp / mcglynn@elsi.jp

12

13 **Abstract**

14 Cyanobacteria thrive in very diverse environments. In Earth history however, delayed oxygenation has  
15 raised questions of growth limitation in ancient environmental conditions. As a single genus, the  
16 *Thermosynechococcus* are known to be cosmopolitan and live in chemically diverse habitats. To  
17 understand the genetic basis for this, we compared the protein coding component of  
18 *Thermosynechococcus* genomes. Supplementing the known genetic diversity of *Thermosynechococcus*,  
19 we report draft metagenome-assembled genomes of two *Thermosynechococcus* recovered from ferrous  
20 carbonate hot springs in Japan. We find that as a genus, *Thermosynechococcus* is genomically  
21 conserved, having a small pan-genome with few accessory genes per individual strain and only 18  
22 protein clusters appearing in all *Thermosynechococcus* but not in any other cyanobacteria in our  
23 analysis. Furthermore, by comparing orthologous protein groups, including an analysis of genes  
24 encoding proteins with an iron related function (uptake, storage or utilization), no clear differences in  
25 genetic content, or adaptive mechanisms could be detected between genus members, despite the range  
26 of environments they inhabit. Overall, our results highlight a seemingly innate ability for  
27 *Thermosynechococcus* to inhabit diverse habitats without having undergone substantial genomic  
28 adaptation to accommodate this. The finding of *Thermosynechococcus* in both hot and high iron

29 environments without adaptation recognizable from the perspective of protein coding genes has  
30 implications for understanding the basis of thermophily within this clade, and also suggests that ferrous  
31 iron in ancient oceans may not have inhibited the proliferation of Cyanobacteria on Earth. The conserved  
32 core genome may be indicative of an allopatric lifestyle – or reduced genetic complexity of hot spring  
33 habitats relative to other environments.

34

35 **Keywords:** cyanobacteria, great oxygenation event, hot springs, comparative genomics, pan-genome,  
36 *Thermosynechococcus*

37

38

39

## 40 Introduction

41 Water oxidizing cyanobacteria fundamentally altered the distribution of carbon and electrons on Earth  
 42 (Canfield, 1998; Raven, 2009; Ward and Shih, 2019). A marker of this reorganization is in the Great  
 43 Oxygenation Event (GOE), which marks a major transition in the evolution of life on Earth ~2.3 billion  
 44 years ago (Lyons *et al.*, 2014; Fischer *et al.*, 2016). While the GOE is widely accepted to have been  
 45 driven by the production of O<sub>2</sub> by oxygenic photosynthesis performed by members of the Cyanobacteria,  
 46 the timing and proximal trigger for the GOE is debated. At least six hypotheses for the timing of the GOE  
 47 can be considered i) the evolution of oxygenic photosynthesis by Cyanobacteria just before the GOE  
 48 (Fischer *et al.*, 2016; Shih *et al.*, 2017), ii) an earlier evolution of Cyanobacteria with O<sub>2</sub> accumulation  
 49 delayed due to the transition of cyanobacteria from small-scale freshwater to large-scale marine  
 50 environments (Sánchez-Baracaldo, 2015), iii) the transition from unicellular to multicellular organisms  
 51 for increased evolutionary success (Schirrmeister *et al.*, 2015), iv) the inhibition of early cyanobacteria  
 52 due to high iron concentrations (Swanner, Mloszewska, *et al.*, 2015; Swanner, Wu, *et al.*, 2015), v) a  
 53 possible nitrogen throttle on cyanobacterial growth (Fennel *et al.*, 2005; Shi and Falkowski, 2008; Allen  
 54 *et al.*, 2019), vi) or depressed Archaean productivity due to phosphate availability (Hao *et al.* 2020).  
 55 Although cyanobacterial taxonomy continues to be refined (Knoll 2006; Tomitani *et al.*, 2006; Shih *et al.*,  
 56 2013; Soo *et al.*, 2019; Parks *et al.*, 2020), understanding the ecological distribution of cyanobacteria  
 57 may help us generate, or reject hypotheses about their evolutionary trajectories, and the factors which  
 58 led to the observed timing of the GOE.

| Name                                                     | Strain name<br>( <i>Thermosynechococcus</i> ) | Max.<br>Temperature<br>[°C] | pH             | Sulfate<br>[mM]  | Iron [mM] | References                                                                                                              |
|----------------------------------------------------------|-----------------------------------------------|-----------------------------|----------------|------------------|-----------|-------------------------------------------------------------------------------------------------------------------------|
| Kangding<br>Geothermal<br>Field<br>(Sichuan,<br>China)   | <i>T. elongatus</i> PKUAC-<br>SCTE54          | 94                          | 6.35 –<br>8.84 | 1.2              | 0.0104    | Mei-hua <i>et al.</i> , 2015; Guo <i>et al.</i> , 2017; Tang <i>et al.</i> , 2018;<br>Wang <i>et al.</i> , 2019         |
| Okuoku-<br>hachikurou<br>Hot Spring<br>(Akita,<br>Japan) | <i>T. nakabusensis</i> OHK                    | 44                          | 6.8            | 6.5              | 0.114     | Ward <i>et al.</i> , 2017                                                                                               |
| Yunomine<br>Hot Spring<br>(Wakayama,<br>Japan)           | <i>T. vulcanus</i> NIES2134                   | 91                          | 8              | 0.06 –<br>0.229  | < 0.0018  | Ichikuni and Kikuchi, 1972<br>Onsen information sheet*                                                                  |
| Nakabusa<br>Hot Spring<br>(Nagano,<br>Japan)             | <i>T. nakabusensis</i> NK55a                  | 76                          | 8.5 –<br>9     | 0.218 –<br>0.246 | 0.0004    | Nakagawa and Fukui, 2002;<br>Nakamura <i>et al.</i> , 2002;<br>Stolyar <i>et al.</i> , 2014<br>Onsen information sheet* |
| Jinata Hot<br>Spring<br>(Shikinejima,                    | <i>T. nakabusensis</i> Jinata                 | 63                          | 5.4            | 17.4             | 0.261     | Ward <i>et al.</i> , 2019                                                                                               |

|                                                        |                         |    |     |             |        |                                                                                                              |
|--------------------------------------------------------|-------------------------|----|-----|-------------|--------|--------------------------------------------------------------------------------------------------------------|
| <b>Tokyo, Japan)</b>                                   |                         |    |     |             |        |                                                                                                              |
| <b>Chung-Lun Hot Spring (Taiwan)</b>                   | <i>T. CL1</i>           | 62 | 9.3 | 1.35 – 1.39 | 0.0006 | Yeh <i>et al.</i> , 2005; Hsueh <i>et al.</i> , 2007; Maity <i>et al.</i> , 2011; Cheng <i>et al.</i> , 2020 |
| <b>Beppu Hot Spring Kamegawa Shinoyu (Oita, Japan)</b> | <i>T. elongatus</i> BP1 | 78 | 6.8 | 1.09        | 0.0036 | Onsen information sheet*                                                                                     |

59 Table 1: Geochemical parameters for each hot spring. References are related to the first publication of the strains  
 60 or the geochemistry of the hot spring. \*information available online through local governments, last accessed in  
 61 11/2019.

62 Cyanobacteria are found in a wide range of environments – the knowledge of which continues to expand  
 63 (Whitton, 1992; Puente-Sánchez *et al.*, 2018; Callieri *et al.*, 2019). As a single phylogenetic group,  
 64 members of the *Thermosynechococcus* genus have been documented to inhabit a range of chemical  
 65 environments, some of which might be similar to places and times on the early Earth. Those  
 66 *Thermosynechococcus* with genomes available are from hot springs which vary in temperature from 44  
 67 – 94 °C, pH ranging from 5.4 – 9.3, sulfate concentrations between 0.06 mM and 17.4 mM and iron  
 68 concentrations between 0.0004 mM and 0.261 mM (Table 1) at their source. It is noteworthy that for two  
 69 of the genomes - those from Okuoku-hachikurou and Jinata hot springs - the ferrous iron concentrations  
 70 at the source by far exceed those at the other springs with 114 µM at OHK and 261 µM at Jinata (Ward  
 71 *et al.*, 2019; Cheng *et al.*, 2020).

72 Seminal work by Papke *et al.* on phylotype:geographical relationships of *Thermosynechococcus* posed  
 73 questions as to how these organisms could be so widely distributed: in their analysis, the distribution of  
 74 *Thermosynechococcus* could not be explained by measured geochemical parameters.  
 75 *Thermosynechococcus* thus appear to be cosmopolitan, but the basis for this remains unresolved.  
 76 Motivated by the finding of *Thermosynechococcus* members in ferrous iron carbonate hot springs that  
 77 we have been studying (Ward *et al.*, 2017, 2019), and in an attempt to find a genetic basis for the  
 78 geochemically wide distribution of the organisms, we took a comparative genomics approach to search  
 79 for resolvable traits which may underlie environmental adaptations of *Thermosynechococcus* members.

80

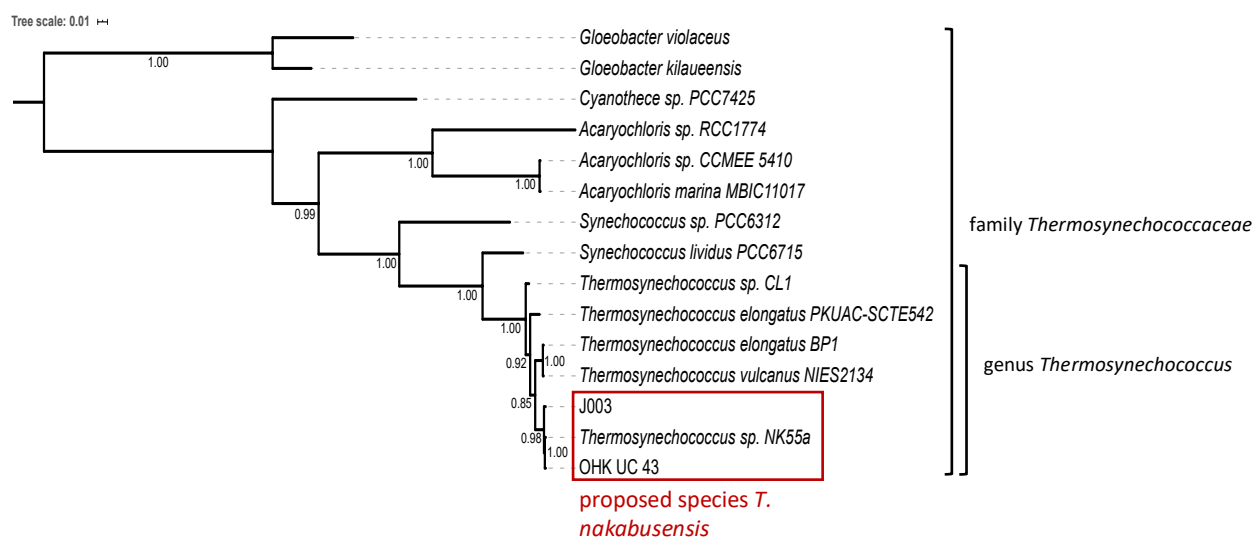

Figure 1: *Thermosynechococcaceae* phylogeny built with concatenated ribosomal proteins. Branch supports are derived from bootstrapping with BOOSTER and the tree scale bar indicates substitutions per nucleotide site.

81

## 82 Methods

### 83 Genome recovery

84 The OHK43 genome was recovered from genome-resolved metagenomic sequencing of samples from  
85 Okuoku-hachikurou Onsen (OHK) in Akita Prefecture, Japan, following methods described previously  
86 (Ward *et al.*, 2019, 2020) and described briefly here. Samples of thin biofilms in the outflow of the hot  
87 spring were sampled for metagenomic sequencing in September 2016. DNA was preserved in the field  
88 with a Zymo Terralyzer BashingBead Matrix and Xpedition Lysis Buffer (Zymo Research, Irvine, CA)  
89 after disruption of cells in polyethylene sample tubes via attachment to and operation of a cordless  
90 reciprocating saw (Makita JR101DZ). Microbial DNA was extracted and purified after return to the lab  
91 with a Zymo Soil/Fecal DNA extraction kit (Zymo Research, Irvine, CA). Quantification of DNA was  
92 performed with a Qubit 3.0 fluorimeter (Life Technologies, Carlsbad, CA). DNA was submitted to  
93 SeqMatic LLC (Fremont, CA) for library preparation using an Illumina Nextera XT DNA Library  
94 Preparation Kit prior to 2x100bp paired-end sequencing via Illumina HiSeq 4000 technology. Raw  
95 sequence reads were quality controlled with BBTools (Bushnell 2014) and assembled with MegaHit v.  
96 1.02 (Li *et al.*, 2016). The OHK43 genome bin was recovered via differential coverage binning with  
97 MetaBAT (Kang *et al.*, 2015). Completeness and contamination/redundancy were determined with  
98 CheckM v1.1.2 (Parks *et al.*, 2015). The genome was uploaded to RAST v2.0 for annotation and  
99 characterization (Aziz *et al.*, 2008). Presence or absence of metabolic pathways of interest was

100 predicted using MetaPOAP v1.0 (Ward *et al.*, 2018). Taxonomic assignment was determined with  
101 GTDB-Tk v1.2 (Parks *et al.*, 2018, 2020; Chaumeil *et al.*, 2019). Genome assembly and quality statistics  
102 for OHK43 and other *Thermosynechococcus* genomes are reported in Supplemental Table 4.

### 103 **Organismal Phylogenies**

104 Concatenated ribosomal phylogenies were constructed following methods from Hug *et al.* (2016).  
105 Members of the *Thermosynechococcaceae* and outgroups were identified using GTDB (Chaumeil *et al.*,  
106 2019) and their genomes downloaded from the NCBI WGS and Genbank databases. Ribosomal protein  
107 sequences were extracted using the tblastn function of BLAST+ (Camacho *et al.*, 2009) and aligned  
108 with MUSCLE (Edgar, 2004). Trees were built with RAxML v.8.2.12 (Stamatakis, 2014) on the Cipres  
109 science gateway (Miller *et al.*, 2010). Transfer bootstrap support values were determined with  
110 BOOSTER (Lemoine *et al.*, 2018). Visualization of trees was performed with the Interactive Tree of Life  
111 Viewer (Letunic and Bork, 2016).

### 112 **Genome comparison**

113 We compared the core- and pangenomes of *Thermosynechococcus* at the genus level, family level and  
114 with a sub-sample of Cyanobacteria across the GTDB defined class Cyanobacteriia. ProteinOrtho  
115 (Lechner *et al.*, 2011) was used for the identification of Conserved Likely Orthologous Groups (CLOG)  
116 and analysis.

117 At the genus level 7 *Thermosynechococcus* strains from varying hot spring environments (Table 1 and  
118 2) were compared. The genomic data from five available sequences of *Thermosynechococcus* strains  
119 *T. sp.* CL1/1-2178 (CL1), *T. elongatus* BP1/1-2178 (*elongatus* BP1), *T. vulcanus* NIES2134/1-2178  
120 (*vulcanus*), *T. sp.* NK55a/1-2022 (NK55a), *T. elongatus* PKUAC-SCTE542 (*elongatus* PKUAC) and two  
121 unnamed strains from Jinata Onsen (Jinata) and Oku-Okuhachikurou Onsen (OHK) in Japan were  
122 compared using ProteinOrtho (Lechner *et al.*, 2011), BLAST (Altschul *et al.*, 1990), and FeGenie (Garber  
123 *et al.*, 2019). Phylogenetic relationships between these strains were established using concatenated  
124 ribosomal protein phylogenies following Hug *et al.* (2016), taxonomic classifications with GTDB-tk  
125 (Chaumeil *et al.*, 2019) and average nucleotide identities (Rodriguez-R and Konstantinidis, 2017).

126 For the analysis at the family level, we included 6 more species that appear as representative strains at  
127 the *Thermosynechococcaceae* family level in the Genome Taxonomy Data Base (GTDB). The  
128 representative GTDB strains include *Acaryochloris marina* MBIC11017, *Cyanothece sp.* PCC 7425,

129 *Acaryochloris* sp. CCMEE 5410, *Synechococcus* sp. PCC 6312, *Synechococcus lividus* PCC 6715 and  
130 *Acaryochloris* sp. RCC1774. This resulted in a total of 13 strains for family level analysis.

131 At the class level we used the 7 genus level strains and additionally 16 species, which do not cover all  
132 of the family level species, 15 after (Beck *et al.*, 2012) and one more *Gloeobacter* species (*G. kilaueensis*  
133 JS-1). Here the goal was to test the coherence of our analysis parameters when compared to previous  
134 studies of cyanobacterial core- and pangenomes (Beck *et al.*, 2012, 2018). We acknowledge that the  
135 distribution of species within the families of the class is not even, however this comparison was used to  
136 verify our methods and the stability of the class level core. This resulted in a total of 23 genomes for the  
137 class level analysis.

138 It is important to note that although the spring source water properties differ, the source water is not  
139 necessarily where the DNA originated. Thus there is some uncertainty in the precise  
140 geochemistry:genome relationships discussed here. We also acknowledge that not all genomes in this  
141 study reach 100 % completeness. We might therefore be missing some gene clusters and some  
142 genomes might cluster differently if they were complete. We compared genomic data as of August 4<sup>th</sup>,  
143 2020.

144 To compare the appearance of genes related to iron uptake and regulation we used FeGenie (Garber  
145 *et al.*, 2019) with standard parameters. We used results from ProteinOrtho (Lechner *et al.*, 2011) for  
146 further analysis of the core, shared, unique, TS core and TS shared clusters. Proteinortho was applied  
147 such that the output included also singleton clusters (only containing a single protein) and with an  
148 algebraic connectivity of 0 as a measure for the structure of the orthologous clusters. We did not obtain  
149 many differences when running ProteinOrtho on our data using a value of 0 or 0.1 (default) for the  
150 algebraic connectivity, however, a value of 0 resulted in slightly larger clusters for the core and a few  
151 less singletons. A comparison of results from FeGenie and ProteinOrtho resulted in similar gene clusters  
152 for iron related genes such that our results here are based on both program outputs.

153

154

155

156

157

158

159 **Results and Discussion**

| Genome Size                          | <i>T. nakabusensis</i><br>Jinata | <i>T. nakabusensis</i><br>OHK | <i>T. elongatus</i><br>BP-1 | <i>T. elongatus</i><br>PKUAC-<br>SCTE542 | <i>T. sp</i><br>CL1 | <i>T. nakabusensis</i><br>NK55a | <i>T. vulcanus</i><br>NIES2134 |
|--------------------------------------|----------------------------------|-------------------------------|-----------------------------|------------------------------------------|---------------------|---------------------------------|--------------------------------|
| <i>T. nakabusensis</i><br>Jinata     | 2.31 MB                          | 99.70                         | 92.65                       | 86.82                                    | 87.53               | 99.68                           | 92.59                          |
| <i>T. nakabusensis</i><br>OHK        |                                  | 2.25 MB                       | 92.58                       | 86.85                                    | 87.52               | 99.84                           | 92.55                          |
| <i>T. elongatus</i><br>BP-1          |                                  |                               | 2.59 MB                     | 86.65                                    | 87.34               | 92.53                           | 99.14                          |
| <i>T. elongatus</i><br>PKUAC-SCTE542 |                                  |                               |                             | 2.64 MB                                  | 89.95               | 86.81                           | 86.637                         |
| <i>T. sp</i><br>CL1                  |                                  |                               |                             |                                          | 2.64 MB             | 87.50                           | 87.32                          |
| <i>T. nakabusensis</i><br>NK55a      |                                  |                               |                             |                                          |                     | 2.51 MB                         | 92.45                          |
| <i>T. vulcanus</i><br>NIES2134       |                                  |                               |                             |                                          |                     |                                 | 2.57 MB                        |

Genome Sizes for GTDB representative family level species:

|                                       |         |
|---------------------------------------|---------|
| <i>Acaryochloris marina</i> MBIC11017 | 8.36 MB |
| <i>Acaryochloris</i> sp. CCME 5410    | 7.87 MB |
| <i>Cyanothece</i> sp. PCC 7425        | 5.78 MB |
| <i>Synechococcus lividus</i> PCC 6715 | 2.65 MB |
| <i>Synechococcus</i> sp. PCC 6312     | 3.72 MB |
| <i>Acarychloris</i> RCC 1774          | 5.93 MB |

160 Table 2: Genus level average nucleotide identities (ANI) and genome sizes (diagonal). Additionally, genomes sizes for  
161 family level species are added in the lower left.

162 **Phylogeny of the *Thermosynechococcus* and the species proposal *T. nakabusensis***

163 The *Thermosynechococcus* genus is phylogenetically coherent within the Cyanobacteria (Figure 1) and  
164 the genome sizes of genus members are similar to one another (Table 2). Based on similarity observed  
165 with ANI and GTDB-tk (Table 2, supplementary Table 4), 4 species are present within the  
166 *Thermosynechococcus* genus: *T. elongatus* BP1 and *T. vulcanus* belonging to one species, *T. NK55a*,  
167 the Jinata and OHK genomes belonging to a second species, and *T. CL1* and *T. elongatus* PKUAC-  
168 SCTE542 as one species each. For the species including the *T. NK55a*, Jinata, and OHK genomes we  
169 propose the name *Thermosynechococcus nakabusensis* as the first and so far only isolated organism  
170 which originates from Nakabusa hot spring in Nagano Prefecture, Japan.

171 **Genus and family level comparison of *Thermosynechococcus* and**  
172 ***Thermosynochococcaceae***

173 Comparing the conserved likely orthologous groups (CLOGS), we analyzed i) the core-genomes: those  
174 CLOGS shared by all genomes in an analysis, ii) the shared CLOGs: those shared by at least 2 but not  
175 all of the genomes in the analysis, and iii) unique CLOGs: those CLOGs that are unique to a single



176 genome (Table 3). The *Thermosynechococcus* genus specific core (**core TS**) comprises CLOGs shared  
 177 by all 7 genus level genomes that are not present in any other species, and the *Thermosynechococcus*  
 178 genus-specific shared CLOGs (**shared TS**) corresponds to CLOGs that are shared by at least 2 and at  
 179 most 6 genus level genomes.

|                                                                               | Genus (7 genomes) | Family (13 genomes) | Class (23 genomes) |
|-------------------------------------------------------------------------------|-------------------|---------------------|--------------------|
| <b>Core of all genomes analyzed</b>                                           | 1878              | 1283                | 742                |
| <b>Core of 5 <i>Thermosynechococcus</i> (not including <i>Jinata/OHK</i>)</b> | 27                | 3                   | 3                  |
| <b><i>Jinata</i> and <i>OHK</i> only</b>                                      | 28                | 25                  | 24                 |
| <b>Protein Clusters Unique to <i>Thermosynechococcus</i> genus</b>            | -                 | 18                  | 79*                |

180 Table 3 - Numbers of CLOGs per grouping and phylogenetic level. \*note that the number of genus level  
 181 core CLOGs increases due to the exclusion of some family level genomes at the class level.

182 Comparing the genomes of the seven genus members, the protein core is made up of 1878 CLOGs and  
 183 contains 80 to 89 % of the putative protein coding genes in a genome. This is higher than in other  
 184 comparisons of organisms, for example in Reno *et al.* (2009) 69 – 79 % of genes from *S. islandicus*  
 185 strains made up the core. Wu *et al.* (2018) found that the core genes of species belonging to the genus  
 186 *Comamonas* account for 18 – 33 % of all genes, and Barajas *et al.* (2019) investigated the core genome  
 187 within the genus *Streptococcus* which ranges in size from 9.6 % to 24 %. The high proportion of CLOGs  
 188 which make up the core leaves few unique CLOGs for each genome and between genus members, and  
 189 only slight variations in genome content between genome are observed: for example 27 CLOGs are  
 190 specific to the 5 genomes that do not include *Jinata* and *OHK* and 28 CLOGs are specific to *Jinata* and  
 191 *OHK* (Figure 2, supplementary Figure 1).

192 Golicz *et al.* (2020) suggested that the size of a pangenome is related to organismal lifestyles, with  
 193 sympatric organisms having open pangenomes with many accessory genes and allopatric (isolated from  
 194 other organisms) organisms having more closed and conserved pangenomes. The  
 195 *Thermosynechococcus* genus could thus be considered as allopatric as they have a comparatively large  
 196 core and few shared and unique genes. Chen *et al.* (2020) also noted that differences in horizontal gene  
 197 transfer (HGT) are related to genome size with smaller genomes showing less HGT and bigger genomes  
 198 having a larger probability that HGT occurred. They also found that hot spring cyanobacteria specifically  
 199 have smaller genome sizes and less HGT into the genome. Excluding gene loss, we suggest that the  
 200 conserved core might be indicative of a more ancient gene repertoire in hot spring cyanobacteria, with

201 other cyanobacteria gaining more functionality through HGT over evolutionary timescales. Furthermore  
 202 thermotolerance is phylogenetically scattered across the cyanobacterial tree of life, mostly in organisms  
 203 comprising smaller genomes. Since all *Thermosynechococcus* in this study are found in hot springs –  
 204 which typically have reduced microbial diversity in comparison to other environments such as soils  
 205 (Ward *et al.*, 1998) – this finding provides support for the still tentative hypothesis that hot spring  
 206 environments may provide more limited opportunity for lateral gene transfer, which in turn could lead to  
 207 less opportunity for lateral gene transfer and smaller genomes.

208 In contrast to the genus level where genome size varies from 2.25 MB to 2.64 MB, at the family level it  
 209 varies to 8.36 MB (*Acaryochloris marina* MBIC11017, Table 2). Running proteinortho analyses with the  
 210 seven genus level *Thermosynechococcus* and the six family level sequences, the overall core is reduced

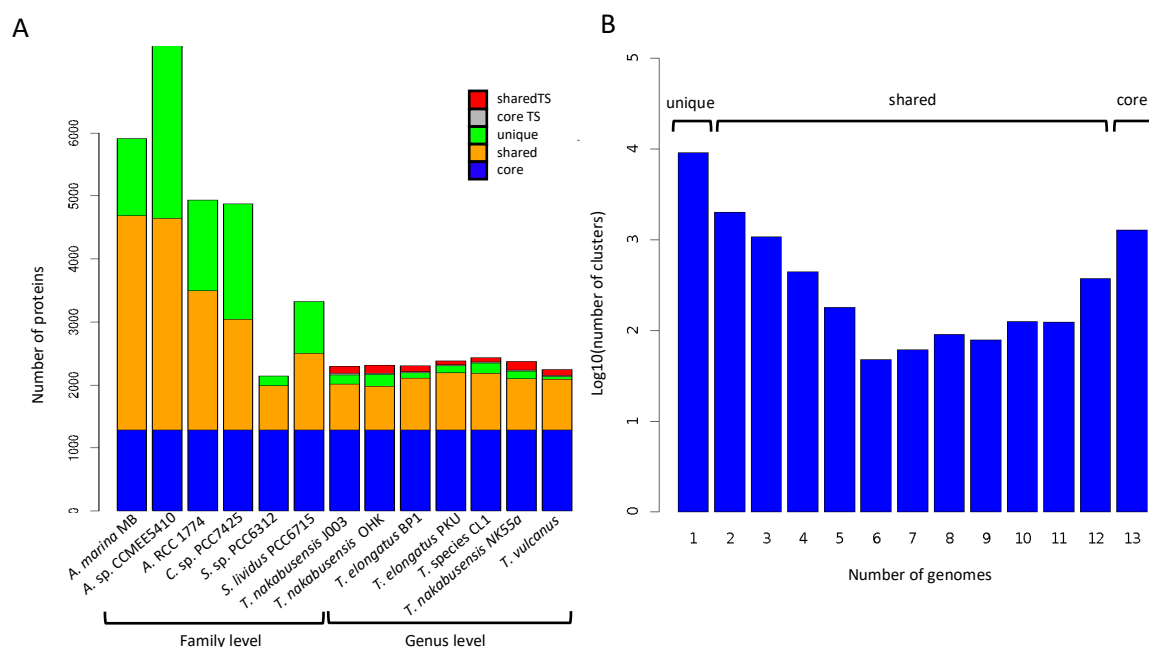

Figure 2: (A) *Thermosynechococcaceae* family level comparison of core- and pangenomes, (B) number of CLOGs observed at the family level in relationship to the number of genomes in the analysis. coreTS indicates CLOGs found in all genus level genomes, sharedTS are CLOGs found in at least 2 but not all genus level genomes and no other genomes. Full species names as mentioned above.

211 by just over 30%, from 1878 to 1283 CLOGs. This number of ~1900 core CLOGs within the genus is  
 212 different from a recent analysis (Cheng *et al.*, 2020), with the higher number observed here being due  
 213 to the inclusion of the newly available and revised *T. elongatus* PKUAC-SCTE542 genome. Shared  
 214 genes, not core genes, comprise a larger percentage of the genomes for smaller genomes, while unique  
 215 genes are abundant in larger genomes (Figure 2a).

216 Including the added diversity at the family level, the number of CLOGs shared between the 5  
217 *Thermosynechococcus* genus members that do not include Jinata and OHK is reduced from 27 to 3,  
218 showing that these CLOGs are found in other closely related members at the family level. However, the  
219 number of CLOGs found only in Jinata and OHK changes from 28 to 25 CLOGs, highlighting that these  
220 are unique. Also observed when comparing the *Thermosynechococcus* genus across the  
221 *Thermosynochococcaceae* family, the specific CLOGs that appear in only, and all of the 7 genus level  
222 genomes is made up of 18 CLOGs, showing a low number of conserved *Thermosynechococcus* genus  
223 only CLOGs. From the CLOG perspective, the seven members share much in common with their closest  
224 relatives, but they appear to lack major distinguishing qualities.

### 225 **Genomic differentiation of the *Thermosynechococcus* genus from other cyanobacteria**

226 At the class level the number of *Thermosynechococcus* genus level core CLOGs increases when compared  
227 to the family level due to the exclusion of some family level species at this level (see Methods and Table 3).  
228 The overall core decreases by almost 60% when class level representatives are added (1878 core  
229 CLOGs at the genus level and 742 core CLOGs at the class level). This is expected as Beck *et al.* (2018)  
230 suggested that the clustering of CLOGs depends on the variability in genome size as well as  
231 phylogenetic distance between the analyzed genomes as well as the total amount of genomes analyzed.  
232 Moreover this is also in line with the larger analyses of microbial genomes which have shown that the  
233 continued addition of taxonomic diversity in an analysis in an analysis leads to increasingly smaller cores  
234 (Charlebois and Doolittle, 2004; Lapierre and Gogarten, 2009).

235 Overall these results conform with Beck *et al.* (2012), with variations attributed to the different methods  
236 and parameters used for each analysis. Additionally, we confirm that the class level core is stable when  
237 adding a higher diversity of organisms, similar to Beck *et al.* (2018), as the number of core family CLOGs  
238 only slightly decreases when adding more species at the class level.

239 At the class level, we looked at specific cases among the shared, but not unique CLOGs, to investigate  
240 gene content which may differentiate the *Thermosynechococcus* genus from other cyanobacteria. In the  
241 case of CLOGs which appear in all *Thermosynechococcus* but not in any other cyanobacteria in our  
242 analysis, 79 CLOGs were found, 47 of which are hypothetical proteins of unknown functions and could  
243 be of interest to further biochemical studies to understand the adaptations of the genus. CLOGs unique  
244 to the genus appear to be of known functionalities account for a variety of processes with genes involved  
245 in transcriptional regulation, transporters and membrane proteins (e.g. acetyltransferases, glycosidases

246 and ATPases; more information in supplementary Table 2). Since all the *Thermosynechococcus*  
247 analyzed are from hot springs, these genes potentially provide some basis for that lifestyle.

## 248 **Adaptation of *Thermosynechococcus* to their respective environments**

249 We were especially interested in those CLOGs that are shared between the strains from environments  
250 with elevated iron concentrations (Jinata and OHK) but which are not present in any other cyanobacteria.  
251 Previous studies have shown that some cyanobacteria express higher levels of genes involved in iron  
252 ion homeostasis which are expressed in iron limiting conditions (Cheng and He, 2014), and here we  
253 looked at the presence or absence of iron related gene products in *Thermosynechococcus* compared  
254 to other cyanobacteria using FeGenie and BLAST comparisons. 24 CLOGs are specific to Jinata and  
255 OHK at the class level, some of which show high partial identity but low coverage matches with genes  
256 from other *Thermosynechococcus* (supplementary Table 4). It is notable that these 24 CLOGs do not  
257 appear in the third strain of the same species (NK55a). With our current understandings after  
258 considering results from BLAST and FeGenie, none of the 24 CLOGs comprises genes that could  
259 explain the organisms adaptation to elevated iron concentrations. 3 unique CLOGs are found in the 5  
260 *Thermosynechococcus* that do not include Jinata and OHK, and we confirmed that none of those  
261 CLOGs are related to iron regulation as best as can be assessed from the sequence, similar to the  
262 Jinata and OHK CLOGs (supplementary Table 4). There is no sequence resolvable genomic signature  
263 specific to Jinata and OHK related to iron tolerance.

264 These genomes lack genes coding ferrous iron transport and uptake proteins EfeB, EfeO and EfeU, the  
265 metal transport gene ZupT, cellular iron storage proteins Bfr and the iron regulator under iron limiting  
266 conditions PfsR (Table 4). Genes encoding these proteins are found in other species of cyanobacteria,  
267 but not in the *Thermosynechococcus* genus members with currently available genomes. Within the  
268 genus there are no differences with regard to genes encoding proteins involved in iron regulation (PfsR),  
269 and in all cases the same genes encoding proteins related to ferrous iron uptake (FeoA, FeoB, YfeA  
270 and YfeB), ferric iron uptake or transport (ExbD, FutA, FutB and FutC), siderophore iron acquisition  
271 (FpvD), metal ion binding (Ho1 and Ho2) and iron starvation acclimation (IsiA) are present (Table 4).

272

273

274

| Protein     | Function                                      | BP-1                                                         | PKUAC | CL1 | NK55a | vulcanus | Jinata | OHK | Present in Thermosyn                    | Reference                                      |
|-------------|-----------------------------------------------|--------------------------------------------------------------|-------|-----|-------|----------|--------|-----|-----------------------------------------|------------------------------------------------|
| <b>FeoA</b> | ferrous iron uptake                           | X                                                            | X     | X   | X     | X        | X      | X   | All                                     | Lau <i>et al.</i> , 2016                       |
| <b>FeoB</b> | ferrous iron uptake                           | X                                                            | X     | X   | X     | X        | X      | X   | All                                     | Lau <i>et al.</i> , 2016                       |
| <b>YfeA</b> | ferrous iron uptake                           | X                                                            | X     | X   | X     | X        | X      | X   | All                                     | Toulza <i>et al.</i> , 2012                    |
| <b>YfeB</b> | ferrous iron uptake                           | X                                                            | X     | X   | X     | X        | X      | X   | All                                     | Toulza <i>et al.</i> , 2012                    |
| <b>FpvD</b> | siderophore iron acquisition                  | X                                                            | X     | X   | X     | X        | X      | X   | All                                     | Brillet <i>et al.</i> , 2012                   |
| <b>ExbD</b> | ferric iron uptake                            | X                                                            | X     | X   | X     | X        | X      | X   | All                                     | Jiang <i>et al.</i> , 2015                     |
| <b>PfsR</b> | iron regulator under iron limiting conditions | Not found when Blasting Synechocystis sequence               |       |     |       |          |        |     | Synechocystis and others                | Cheng and He, 2014                             |
| <b>FutA</b> | ABC-type ferric iron transport                | X                                                            | X     | X   | X     | X        | X      | X   | All                                     | Katoh <i>et al.</i> , 2001                     |
| <b>FutB</b> | ABC-type ferric iron transport                | X                                                            | X     | X   | X     | X        | X      | X   | All                                     | Katoh <i>et al.</i> , 2001                     |
| <b>FutC</b> | ABC-type ferric iron transport                | X                                                            | X     | X   | X     | X        | X      | X   | All                                     | Katoh <i>et al.</i> , 2001                     |
| <b>EfeB</b> | ferrous iron transport                        | Not found when Blasting Synechococcus sequence               |       |     |       |          |        |     | Synechococcus and others                | Lau <i>et al.</i> , 2016                       |
| <b>EfeO</b> | ferrous iron transport                        | Not found when Blasting Synechococcus sequence               |       |     |       |          |        |     | Synechococcus and others                | Lau <i>et al.</i> , 2016                       |
| <b>EfeU</b> | ferrous iron uptake                           | Not found when Blasting Microcystis sequence                 |       |     |       |          |        |     | Microcystis aeruginosa                  | Lau <i>et al.</i> , 2016                       |
| <b>ZupT</b> | metal transport (including ferrous iron)      | Not found when Blasting with Synechococcus sequence as query |       |     |       |          |        |     | Synechococcus, J055 and J083 and others | Lau <i>et al.</i> , 2016                       |
| <b>Bfr</b>  | cellular iron storage                         | Not found when Blasting with Synechococcus sequence as query |       |     |       |          |        |     | Synechococcus and others                | Keren <i>et al.</i> , 2004; Cheng and He, 2014 |
| <b>IsiA</b> | iron starvation acclimation                   | X                                                            | X     | X   | X     | X        | X      | X   | Some                                    | Cheng and He, 2014                             |
| <b>Ho1</b>  | metal ion binding                             | X                                                            | X     | X   | X     | X        | X      | X   | Some                                    | Cheng and He, 2014                             |
| <b>Ho2</b>  | metal ion binding                             | X                                                            | X     | X   | X     | X        | X      | X   | Some                                    | Cheng and He, 2014                             |

275 Table 4: Genes known to be involved in iron regulation within the class Cyanobacteria and their presence in the

276 *Thermosynechococcus* genus. Presence or absence of genes was confirmed with BLAST searches.

277

278 **The conserved genomic core of *Thermosynechococcus* in relationship to environmental**  
279 **distribution is unique**

280 In addition to resolving a genetic basis for widespread environmental distribution, our work is also  
281 relevant to historical proliferation of cyanobacteria, since some modern-day hot springs and their  
282 biogeochemistries can be used as historical process analogues (Brown *et al.*, 2005, 2007; Ward *et al.*,  
283 2019). Considering contemporary environments, the analysis of *Thermosynechococcus* also provide  
284 insight into island biogeography of microbes. Ionescu *et al.* (2010) observed that the speciation patterns  
285 of microorganisms are shaped by local community structures and environmental influences, and Bahl  
286 *et al.* (2011) additionally suggest a positive correlation between geographic and genetic distance. Papke  
287 *et al.* (2003) found that isolated environments such as geothermal springs may lead to evolutionary  
288 divergence of closely related *Thermosynechococcus* strains due to an island effect. Our analysis  
289 suggests that geographically widespread organisms belonging to the genus inhabit hot springs with  
290 varying geochemistries without genomically recognizable adaptations specific to their site of origin.  
291 Instead, the finding of highly conserved genomes within the genus, and furthermore, that the genetic  
292 content of the genus is not markedly different from other cyanobacteria, implies that the genus is  
293 inherently flexible and viable in the geochemical regimes studied. The large portion of shared genes  
294 within the genus provides a genetic basis for the lack of correlation between geographic and genetic  
295 distances within the genus found by Papke *et al.* (2003).

296 This genomic coherence at the genus level is in contrast to other studies, such as Reno *et al.* (2009;  
297 Wu *et al.* (2018) or Barajas *et al.* (2019) as mentioned above. Furthermore the organisms tested by Reno  
298 *et al.* (2009) are obligate thermoacidophilic archaea at the species level which are environmentally  
299 restricted similar to organisms here. They found that the core and pan genomes of these organisms are  
300 shaped by their geographical distribution and relatedness within and across different environments.  
301 Apparently, *Thermosynechococcus* is environmentally promiscuous, and have fewer restrictive  
302 requirements concerning their distribution.

303 **Outlook**

304 One aim of this study was to identify those proteins that make hot-spring inhabiting  
305 *Thermosynechococcus* genus members unique. Although the genus *Thermosynechococcus* is rather  
306 genomically conserved, 47 out of the 79 CLOGs unique to these genomes are identified as hypothetical  
307 proteins of unknown function and thus biochemical studies on these proteins is warranted.

308 Based on the genome comparisons presented here, a viability test of isolates in environments other  
309 than those of their origin is suggested as future work. For example, since *Thermosynechococcus* is  
310 lacking genes that are involved in iron regulation under limiting conditions, genus level iron tolerance  
311 experiments are proposed to test if strains from low-iron environments can also withstand elevated iron  
312 without any adaptations in their genome. In a similar way thermotolerance of these organisms could  
313 also be investigated. This could help us understand if *Thermosynechococcus* is indeed less restrictive  
314 or to identify mechanisms unresolvable by the CLOG approach that account for the geographical  
315 distribution.

316 Traits which are unresolvable with an orthology comparison approach like that employed here include  
317 amino acid substitutions or sequence changes that lead to variations in enzyme activity, structure, and  
318 regulation. Furthermore our analysis is not sensitive to differences in gene regulation or gene copy  
319 number. Access to solvents, solubility, active site peptides and differential folding can influence a  
320 protein's functionality and therefor may have implications for adaptability or infer evolutionary history  
321 (Lesk and Chothia, 1986; Pandey and Braun, 2020). If the orthology approach employed here is correct,  
322 the geochemical parameters that are often thought to be important in microbial selection might simply  
323 be not as important as we assume them to be in the environment. Here, orthology between genes was  
324 assessed based on sequence comparison (proteinortho, BLAST) and sequence and structure  
325 comparison (FeGenie, HMMer). However, there exists a diverse set of methods and approaches to  
326 determine orthology between genes (Lechner *et al.*, 2011; Forslund *et al.*, 2018), and as orthology  
327 definition techniques change, our results could be interpreted.

328 From an Earth history perspective, the presence of cyanobacteria in high-iron environments today could  
329 indicate that ancient cyanobacteria may not have been limited by elevated iron concentrations on early  
330 Earth, whereas previous studies have reported on the toxicity of high iron concentrations to  
331 cyanobacteria (Swanner, Mloszewska, *et al.*, 2015; Swanner, Wu, *et al.*, 2015). We could not find  
332 striking adaptive mechanisms on a genome level that can explain the tolerance of strains found in  
333 environments with elevated iron concentrations, however the presence and perseverance of  
334 cyanobacteria in these environments have important implications when considering the earliest  
335 organisms capable of oxygenic photosynthesis on early Earth. Ionescu *et al.* proposed that simply by  
336 increasing photosynthetic rate and oxygen production, cyanobacteria might protect themselves from  
337 ferrous iron by promoting its precipitation at some distance from the cell (Ionescu *et al.*, 2014). In line  
338 with this observation, is worthwhile to note that the biomass accumulation in high iron environments like

339 Jinata hot spring is appreciable, with co-occurring visible biomass and super saturated dissolved oxygen  
340 concentrations from cyanobacterial activity (Ward *et al.*, 2019).

#### 341 **Data availability for newly described strains**

342 The Whole Genome Shotgun project for OHK43 has been deposited at DDBJ/ENA/GenBank under the  
343 accession JACOMP000000000. The version described in this paper is version JACOMP010000000.

#### 344 **Supplemental Material**

345 SI Figure 1 – class and genus level comparison of core- and pan-genomes; distribution of number of  
346 CLOGs with number of genomes at class and genus level. Core TS corresponds to the CLOGs found  
347 in all *Thermosynechococcus* genus members, and shared TS corresponds to CLOGs that are shared  
348 by at least 2 and at most 6 genus level genomes.

349 SI Table 1 – *Thermosynechococcus* core CLOGs at class level and their hits in the BLAST protein  
350 database.

351 SI Table 2 – Jinata and OHK specific CLOGs at class level with coverage and identity scores, 5 TS  
352 specific CLOGs at class level

353 SI Table 3 – genome information for all family level genomes.

#### 354 **Acknowledgements**

355 LMW was supported by a Simons Foundation Postdoctoral Fellowship in Marine Microbial Ecology.  
356 Metagenomic sequencing of OHK was supported by NSF grant #OISE 1639454. SEM acknowledges  
357 support from the Astrobiology Center Program of the National Institutes of Natural Sciences (grant no.  
358 AB311013). We would also like to thank the group around M. Daroch for providing us with an updated  
359 version for the *T. elongatus* PKUAC-SCTE542 genome which increased the strain's coherence  
360 compared to previous versions of the genome.

361

362

363

364

365



## 366 References

- 367 Allen, J.F., Thake, B., and Martin, W.F. (2019) Nitrogenase Inhibition Limited Oxygenation of Earth's Proterozoic  
368 Atmosphere. *Trends in Plant Science* **24**: 1022–1031.
- 369 Altschul, S.F., Gish, W., Miller, W., Myers, E.W., and Lipman, D.J. (1990) Basic local alignment search tool.  
370 *Journal of Molecular Biology* **215**: 403–410.
- 371 Aziz, R.K., Bartels, D., Best, A., DeJongh, M., Disz, T., Edwards, R.A., et al. (2008) The RAST Server: Rapid  
372 annotations using subsystems technology. *BMC Genomics* **9**: 75.
- 373 Bahl, J., Lau, M.C.Y., Smith, G.J.D., Vijaykrishna, D., Cary, S.C., Lacap, D.C., et al. (2011) Ancient origins  
374 determine global biogeography of hot and cold desert cyanobacteria. *Nature Communications* **2**: 1–6.
- 375 Barajas, H.R., Romero, M.F., Martínez-Sánchez, S., and Alcaraz, L.D. (2019) Global genomic similarity and core  
376 genome sequence diversity of the *Streptococcus* genus as a toolkit to identify closely related bacterial  
377 species in complex environments. *PeerJ* **2019**: e6233.
- 378 Beck, C., Knoop, H., Axmann, I.M., and Steuer, R. (2012) The diversity of cyanobacterial metabolism: genome  
379 analysis of multiple phototrophic microorganisms. *BMC genomics* **13**: 56.
- 380 Beck, C., Knoop, H., and Steuer, R. (2018) Modules of co-occurrence in the cyanobacterial pan-genome reveal  
381 functional associations between groups of ortholog genes. *PLOS Genetics* **14**: e1007239.
- 382 Brillet, K., Ruffenach, F., Adams, H., Journet, L., Gasser, V., Hoegy, F., et al. (2012) An ABC Transporter with Two  
383 Periplasmic Binding Proteins Involved in Iron Acquisition in *Pseudomonas aeruginosa*. *ACS Chemical*  
384 *Biology* **7**: 2036–2045.
- 385 Callieri, C., Slabakova, V., Dzhembekova, N., Slabakova, N., Peneva, E., Cabello-Yeves, P.J., et al. (2019) The  
386 mesopelagic anoxic Black Sea as an unexpected habitat for *Synechococcus* challenges our understanding  
387 of global “deep red fluorescence.” *ISME Journal* **13**: 1676–1687.
- 388 Camacho, C., Coulouris, G., Avagyan, V., Ma, N., Papadopoulos, J., Bealer, K., and Madden, T.L.  
389 (2009) BLAST+: Architecture and applications. *BMC Bioinformatics* **10**: 1–9.
- 390 Canfield, D.E. (1998) A new model for Proterozoic ocean chemistry. *Nature* **396**: 450.
- 391 Charlebois, R.L. and Doolittle, W.F. (2004) Computing prokaryotic gene ubiquity: Rescuing the core from  
392 extinction. *Genome Research* **14**: 2469–2477.
- 393 Chaumeil, P.-A., Mussig, A.J., Hugenholtz, P., and Parks, D.H. (2019) GTDB-Tk: a toolkit to classify genomes with  
394 the Genome Taxonomy Database. *Bioinformatics* **36**: 1925–1927.
- 395 Chen, M.Y., Teng, W.K., Zhao, L., Hu, C.X., Zhou, Y.K., Han, B.P., et al. (2020) Comparative  
396 genomics reveals insights into cyanobacterial evolution and habitat adaptation. *ISME J* 1–17.
- 397 Cheng, D. and He, Q. (2014) PfsR Is a Key Regulator of Iron Homeostasis in *Synechocystis* PCC 6803. *PLoS ONE*  
398 **9**: e101743.
- 399 Cheng, Y.-I., Chou, L., Chiu, Y.-F., Hsueh, H.-T., Kuo, C.-H., and Chu, H.-A. (2020) Comparative Genomic Analysis  
400 of a Novel Strain of Taiwan Hot-Spring Cyanobacterium *Thermosynechococcus* sp. CL-1. *Frontiers in*  
401 *Microbiology* **11**: 82.
- 402 Edgar, R.C. (2004) MUSCLE: a multiple sequence alignment method with reduced time and space complexity.  
403 *BMC Bioinformatics* **5**:113
- 404 Fennel, K., Follows, M., and Falkowski, P.G. (2005) The co-evolution of the nitrogen, carbon and oxygen cycles  
405 in the proterozoic ocean. *American Journal of Science* **305**: 526–545.
- 406 Fischer, W.W., Hemp, J., and Valentine, J.S. (2016) How did life survive Earth's great oxygenation? *Current*  
407 *Opinion in Chemical Biology* **31**: 166–178.
- 408 Forslund, K., Pereira, C., Capella-Gutierrez, S., da Silva, A.S., Altenhoff, A., Huerta-Cepas, J., et al. (2018) Gearing  
409 up to handle the mosaic nature of life in the quest for orthologs. *Bioinformatics* **34**: 323–329.
- 410 Garber, A.I., Nealson, K.H., Okamoto, A., McAllister, S.M., Chan, C.S., Barco, R.A., and Merino, N. (2019)  
411 FeGenie: a comprehensive tool for the identification of iron genes and iron gene neighborhoods in  
412 genomes and metagenome assemblies. *bioRxiv* 777656.
- 413 Golicz, A.A., Bayer, P.E., Bhalla, P.L., Batley, J., and Edwards, D. (2020) Pangenomics Comes of Age: From  
414 Bacteria to Plant and Animal Applications. *Trends in Genetics* **36**: 132–145.
- 415 Guo, Q., Pang, Z., Wang, Y., and Tian, J. (2017) Fluid geochemistry and geothermometry applications of the  
416 Kangding high-temperature geothermal system in eastern Himalayas. *Applied Geochemistry* **81**: 63–75.
- 417 Hao, J., Knoll, A.H., Hazen, R.M., Daniel, I., Huang, F., and Schieber, J. (2020) Cycling Phosphorus on the Archean  
418 Earth: Part II. Phosphorus Limitation on Primary Production in Archean Ecosystems Pattern-forming  
419 abiotic reactions during organic diagenesis View project Deep Time Data Infrastructure View project  
420 Cycling phosphorus on the Archean Earth: Part II. Phosphorus limitation on primary production in  
421 Archean ecosystems ScienceDirect.

- 422 Hsueh, H.T., Chu, H., and Chang, C.C. (2007) Identification and Characteristics of a Cyanobacterium Isolated  
423 from a Hot Spring with Dissolved Inorganic Carbon. *Environmental Science & Technology* **41**: 1909–1914.
- 424 Hug, L.A., Baker, B.J., Anantharaman, K., Brown, C.T., Probst, A.J., Castelle, C.J., et al. (2016) A new view of the  
425 tree of life. *Nature Microbiology* **1**: 1–6.
- 426 Ichikuni, M. and Kikuchi, K. (1972) Retention of boron by travertines. *Chemical Geology* **9**: 13–21.
- 427 Ionescu, D., Buchmann, B., Heim, C., Håjusler, S., de Beer, D., and Polerecky, L. (2014) Oxygenic photosynthesis  
428 as a protection mechanism for cyanobacteria against iron-encrustation in environments with high Fe<sup>2+</sup>  
429 concentrations. *Frontiers in Microbiology* **5**: 459.
- 430 Jiang, H.-B., Lou, W.-J., Ke, W.-T., Song, W.-Y., Price, N.M., and Qiu, B.-S. (2015) New insights into iron  
431 acquisition by cyanobacteria: an essential role for ExbB-ExbD complex in inorganic iron uptake. *The ISME*  
432 *journal* **9**: 297.
- 433 Kang, D.D., Froula, J., Egan, R., and Wang, Z. (2015) MetaBAT, an efficient tool for accurately reconstructing  
434 single genomes from complex microbial communities. *PeerJ* **2015**: e1165.
- 435 Katoh, H., Hagino, N., and Ogawa, T. (2001) Iron-Binding Activity of FutA1 Subunit of an ABC-type Iron  
436 Transporter in the Cyanobacterium *Synechocystis* sp. Strain PCC 6803, Oxford Academic.
- 437 Keren, N., Aurora, R., and Pakrasi, H.B. (2004) Critical roles of bacterioferritins in iron storage and proliferation  
438 of cyanobacteria. *Plant Physiology* **135**: 1666–1673.
- 439 Knoll, A.H. (2006) Cyanobacteria and Earth History Diverse aspects of testate amoebae evolution View project  
440 The Co-Evolution of the Geo-and Biospheres: An Integrated Program for Data-Driven Abductive Discovery  
441 in Earth Sciences View project.
- 442 Lapierre, P. and Gogarten, J.P. (2009) Estimating the size of the bacterial pan-genome. *Trends in Genetics* **25**:  
443 107–110.
- 444 Lau, C.K.Y., Krewulak, K.D., and Vogel, H.J. (2016) Bacterial ferrous iron transport: the Feo system. *FEMS*  
445 *microbiology reviews* **40**: 273–298.
- 446 Lechner, M., Findeiß, S., Steiner, L., Marz, M., Stadler, P.F., and Prohaska, S.J. (2011) Proteinortho: detection of  
447 (co-) orthologs in large-scale analysis. *BMC bioinformatics* **12**: 124.
- 448 Lemoine, F., Entfellner, J.-B.D., Wilkinson, E., Correia, D., Felipe, M.D., De Oliveira, T., and Gascuel,  
449 O. (2018) Renewing Felsenstein's phylogenetic bootstrap in the era of big data. *Nature* **556**:  
450 452–456.
- 451 Lesk, A.M. and Chothia, C.H. (1986) The response of protein structures to amino-acid sequence changes.  
452 *Philosophical Transactions of the Royal Society of London Series A, Mathematical and Physical Sciences*  
453 **317**: 345–356.
- 454 Letunic, I. and Bork, P. (2016) Interactive tree of life (iTOL) v3: an online tool for the display and  
455 annotation of phylogenetic and other trees. *Nucleic Acids Res* **44**: W242–W245.
- 456 Li, D., Luo, R., Liu, C.M., Leung, C.M., Ting, H.F., Sadakane, K., et al. (2016) MEGAHIT v1.0: A fast and scalable  
457 metagenome assembler driven by advanced methodologies and community practices. *Methods* **102**: 3–  
458 11.
- 459 Lyons, T.W., Reinhard, C.T., and Planavsky, N.J. (2014) The rise of oxygen in Earth's early ocean and  
460 atmosphere. *Nature* **506**: 307.
- 461 Maity, J.P., Liu, C.-C., Nath, B., Bundschuh, J., Kar, S., Jean, J.-S., et al. (2011) Biogeochemical characteristics of  
462 Kuan-Tzu-Ling, Chung-Lun and Bao-Lai hot springs in southern Taiwan. *Journal of Environmental Science*  
463 *and Health, Part A* **46**: 1207–1217.
- 464 Mei-hua, W., Junhao, W., and Tingshan, T. (2015) Study of the Scaling Trend of Thermal Groundwater in  
465 Kangding County of Sichuan Province. *World Geothermal Congress 2015* 11.
- 466 Miller, M.A., Pfeiffer, W., and Schwartz, T. (2010) Creating the CIPRES Science Gateway for  
467 inference of large phylogenetic trees. In *2010 gateway computing environments workshop*  
468 *(GCE)*. Ieee, pp. 1–8.
- 469
- 470 Nakagawa, T. and Fukui, M. (2002) Phylogenetic characterization of microbial mats and streamers from a  
471 Japanese alkaline hot spring with a thermal gradient. *The Journal of General and Applied Microbiology* **48**:  
472 211–222.
- 473 Nakamura, Y., Kaneko, T., Sato, S., Ikeuchi, M., Katoh, H., Sasamoto, S., et al. (2002) Complete genome  
474 structure of the thermophilic cyanobacterium *Thermosynechococcus elongatus* BP-1. *DNA research* **9**:  
475 123–130.
- 476 Pandey, A. and Braun, E.L. (2020) Phylogenetic Analyses of Sites in Different Protein Structural Environments  
477 Result in Distinct Placements of the Metazoan Root. *Biology* **9**: 64.
- 478 Papke, R.T., Ramsing, N.B., Bateson, M.M., and Ward, D.M. (2003) Geographical isolation in hot spring  
479 cyanobacteria. *Environmental Microbiology* **5**: 650–659.

- 480 Parks, D.H., Chuvochina, M., Chaumeil, P.A., Rinke, C., Mussig, A.J., and Hugenholtz, P. (2020) A complete  
481 domain-to-species taxonomy for Bacteria and Archaea. *Nature Biotechnology* 1–8.
- 482 Parks, D.H., Chuvochina, M., Waite, D.W., Rinke, C., Skarshewski, A., Chaumeil, P.A., and Hugenholtz, P. (2018)  
483 A standardized bacterial taxonomy based on genome phylogeny substantially revises the tree of life.  
484 *Nature Biotechnology* **36**: 996.
- 485 Parks, D.H., Imelfort, M., Skennerton, C.T., Hugenholtz, P., and Tyson, G.W. (2015) CheckM: Assessing the  
486 quality of microbial genomes recovered from isolates, single cells, and metagenomes. *Genome Research*  
487 **25**: 1043–1055.
- 488 Puente-Sánchez, F., Arce-Rodríguez, A., Oggerin, M., García-Villadangos, M., Moreno-Paz, M., Blanco, Y., et al.  
489 (2018) Viable cyanobacteria in the deep continental subsurface. *Proceedings of the National Academy of*  
490 *Sciences of the United States of America* **115**: 10702–10707.
- 491 Raven, J. (2009) Contributions of anoxygenic and oxygenic phototrophy and chemolithotrophy to carbon and  
492 oxygen fluxes in aquatic environments. *Aquatic Microbial Ecology* **56**: 177–192.
- 493 Reno, M.L., Held, N.L., Fields, C.J., Burke, P. v., and Whitaker, R.J. (2009) Biogeography of the *Sulfolobus*  
494 *islandicus* pan-genome. *Proceedings of the National Academy of Sciences of the United States of America*  
495 **106**: 8605–8610.
- 496 Rodriguez-R, L.M. and Konstantinidis, K.T. (2017) Bypassing Cultivation To Identify Bacterial Species Culture-  
497 independent genomic approaches identify credibly distinct clusters, avoid cultivation bias, and provide  
498 true insights into microbial species.
- 499 Sánchez-Baracaldo, P. (2015) Origin of marine planktonic cyanobacteria. *Scientific Reports* **5**:
- 500 Schirrmeister, B.E., Gugger, M., and Donoghue, P.C.J. (2015) Cyanobacteria and the Great Oxidation Event:  
501 evidence from genes and fossils. *Palaeontology* **58**: 769–785.
- 502 Shi, T. and Falkowski, P.G. (2008) Genome evolution in cyanobacteria: The stable core and the variable shell.  
503 *Proceedings of the National Academy of Sciences of the United States of America* **105**: 2510–2515.
- 504 Shih, P.M., Hemp, J., Ward, L.M., Matzke, N.J., and Fischer, W.W. (2017) Crown group Oxyphotobacteria  
505 postdate the rise of oxygen. *Geobiology* **15**: 19–29.
- 506 Shih, P.M., Wu, D., Latifi, A., Axen, S.D., Fewer, D.P., Talla, E., et al. (2013) Improving the coverage of the  
507 cyanobacterial phylum using diversity-driven genome sequencing. *Proceedings of the National Academy*  
508 *of Sciences of the United States of America* **110**: 1053–1058.
- 509 Soo, R.M., Hemp, J., and Hugenholtz, P. (2019) Evolution of photosynthesis and aerobic respiration in the  
510 cyanobacteria. *Free Radical Biology and Medicine* **140**: 200–205.
- 511 Stamatakis, A. (2014) RAxML version 8: a tool for phylogenetic analysis and post-analysis of large  
512 phylogenies. *Bioinformatics* **30**: 1312–1313.
- 513 Stolyar, S., Liu, Z., Thiel, V., Tomsho, L.P., Pinel, N., Nelson, W.C., et al. (2014) Genome sequence of the  
514 thermophilic cyanobacterium *Thermosynechococcus* sp. strain NK55a. *Genome Announc* **2**: e01060-13.
- 515 Swanner, E.D., Mloszewska, A.M., Cirpka, O.A., Schoenberg, R., Konhauser, K.O., and Kappler, A. (2015)  
516 Modulation of oxygen production in Archaean oceans by episodes of Fe(II) toxicity. *Nature Geoscience* **8**:  
517 126–130.
- 518 Swanner, E.D., Wu, W., Hao, L., Wüstner, M.L., Obst, M., Moran, D.M., et al. (2015) Physiology, Fe(II) oxidation,  
519 and Fe mineral formation by a marine planktonic cyanobacterium grown under ferruginous conditions.  
520 *Frontiers in Earth Science* **3**: 60.
- 521 Tang, J., Jiang, D., Luo, Y., Liang, Y., Li, L., Shah, Md.M.R., and Daroch, M. (2018) Potential new genera of  
522 cyanobacterial strains isolated from thermal springs of western Sichuan, China. *Algal Research* **31**: 14–20.
- 523 Tomitani, A., Knoll, A.H., Cavanaugh, C.M., and Ohno, T. (2006) The evolutionary diversification of  
524 cyanobacteria: Molecular-phylogenetic and paleontological perspectives. *Proceedings of the National*  
525 *Academy of Sciences of the United States of America* **103**: 5442–5447.
- 526 Toulza, E., Tagliabue, A., Blain, S., and Piganeau, G. (2012) Analysis of the Global Ocean Sampling (GOS) Project  
527 for Trends in Iron Uptake by Surface Ocean Microbes. *PLoS ONE* **7**: e30931.
- 528 Wang, L., Liu, Q., Wu, X., Huang, Y., Wise, M.J., Liu, Z., et al. (2019) Bioinformatics Analysis of Metabolism  
529 Pathways of Archaeal Energy Reserves. *Scientific Reports* 1–12.
- 530 Ward, D.M., Ferris, M.J., Nold, S.C., and Bateson, M.M. (1998) A Natural View of Microbial  
531 Biodiversity within Hot Spring Cyanobacterial Mat Communities. *Microbiol Mol Biol Rev* **62**:  
532 1353–1370.
- 533 Ward, L.M., Fischer, W.W., and McGlynn, S.E. Candidatus Anthektikosiphon siderophilum OHK22, a New  
534 Member of the Chloroflexi Family Herpetosiphonaceae from Oku-okuhachikurou Onsen. *Microbes*  
535 *Environ* **35**: 2020.
- 536 Ward, L.M., Idei, A., Nakagawa, M., Ueno, Y., Fischer, W.W., and McGlynn, S.E. (2019) Geochemical and  
537 Metagenomic Characterization of Jinata Onsen, a Proterozoic-Analog Hot Spring, Reveals Novel Microbial

- 538 Diversity including Iron-Tolerant Phototrophs and Thermophilic Lithotrophs. *Microbes and environments*  
539 **34**: 278–292.
- 540 Ward, L.M., Idei, A., Terajima, S., Kakegawa, T., Fischer, W.W., and McGlynn, S.E. (2017) Microbial diversity and  
541 iron oxidation at Okuoku-hachikurou Onsen, a Japanese hot spring analog of Precambrian iron  
542 formations. *Geobiology* **15**: 817–835.
- 543 Ward, L.M. and Shih, P.M. (2019) The evolution and productivity of carbon fixation pathways in response to  
544 changes in oxygen concentration over geological time. *Free Radical Biology and Medicine* **140**: 188–199.
- 545 Ward, L.M., Shih, P.M., and Fischer, W.W. (2018) MetaPOAP: presence or absence of metabolic pathways in  
546 metagenome-assembled genomes. *Bioinformatics (Oxford, England)* **34**: 4284–4286.
- 547 Whitton, B.A. (1992) Diversity, ecology, and taxonomy of the cyanobacteria. In *Photosynthetic prokaryotes*.  
548 Springer, pp. 1–51.
- 549 Wu, Y., Zaiden, N., and Cao, B. (2018) The Core- and Pan-Genomic Analyses of the Genus *Comamonas*: From  
550 Environmental Adaptation to Potential Virulence. *Frontiers in Microbiology* **9**: 3096.
- 551 Yeh, G.-H., Yang, T.F., Chen, J.-C., Chen, Y.-G., and Song, S.-R. (2005) Fluid geochemistry of mud volcanoes in  
552 Taiwan. *Mud Volcanoes, Geodynamics and Seismicity Springer, Netherlands* 227–237.
- 553
